# Supplementary material for: Enhancer reprogramming in mammalian genomes
Source: PubMed Central journal article supplement (PMC6131754; doi:10.1186/s12859-018-2343-7), 2018-09-10
Supplement: 12859_2018_2343_MOESM1_ESM.pdf [file 12859_2018_2343_MOESM1_ESM.pdf]

**Supplementary Materials**

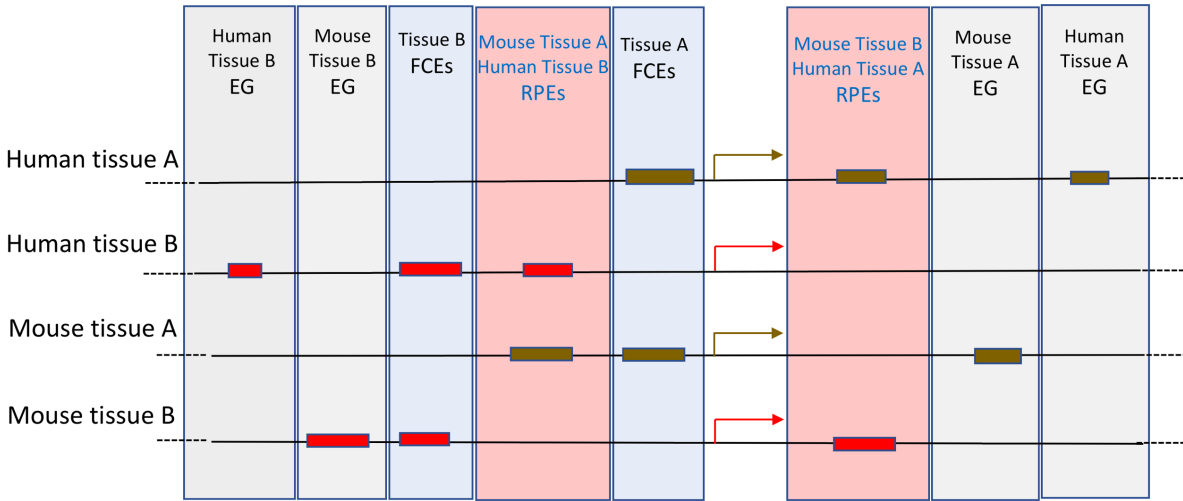

**Figure S1. Schematic of reprogrammed enhancers.** Human enhancers and their mouse counterparts were categorized based on their sequence alignment as: functionally conserved enhancers (FCEs) present in both species, reprogrammed enhancers (RPEs) present in both species but differing in tissue/cell-specificity, and enhancer gains (EGs) present in one species.

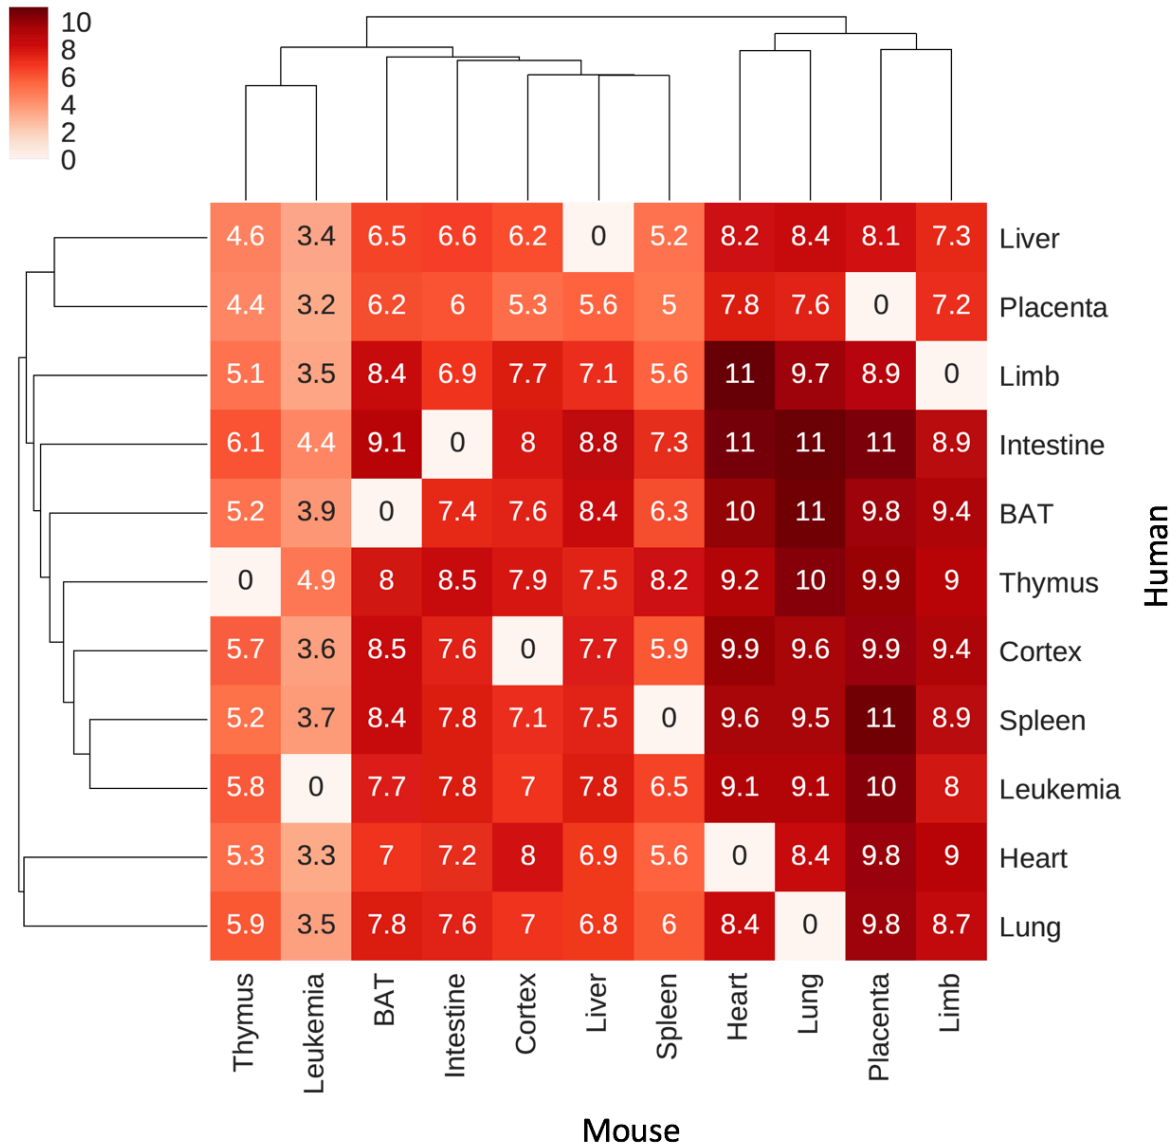

**Figure S2. Percentages of the RPEs for each pair of tissues.** Percentages of enhancers categorized as RPEs for each pair of tissues with respect to the total number of enhancers in each human tissue.

### a. Human

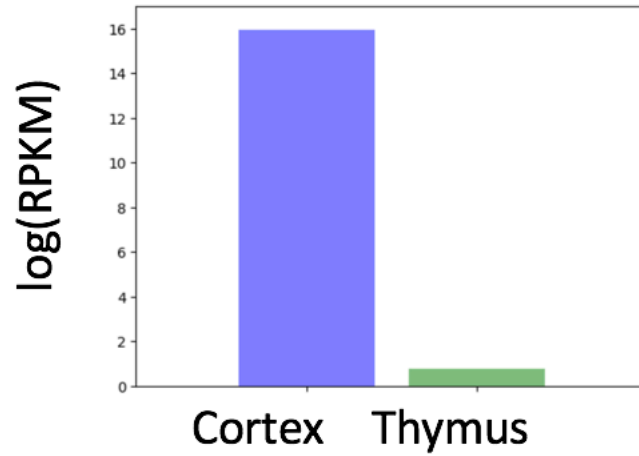

### b. Mouse

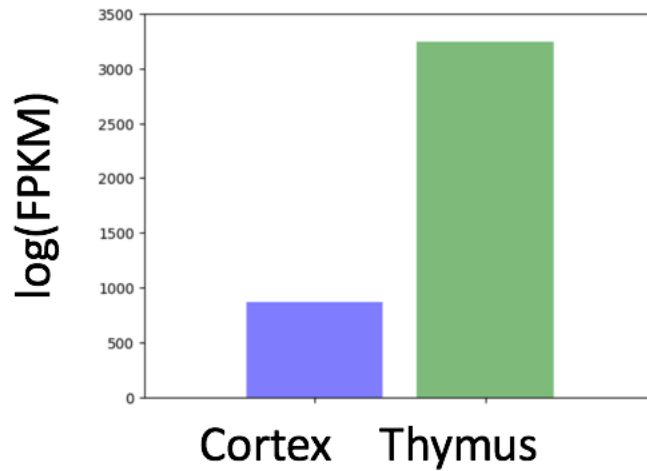

**Figure S3. Log expression of THY1 gene.** A RPE was found approximately at 9 kbp upstream of THY1. The RPE corresponds to the reprogramming to mouse thymus and human cortex. Top panel shows expression in human cortex and thymus as normalized log of Reads Per Kilobase of transcript per Million mapped (RPKM) reads. Bottom panel shows expression in mouse cortex and thymus normalized log of Fragments Per Kilobase of transcript per Million mapped (FPKM) reads. FPKM and RPKM, are similar but FPKM is calculated by counting fragments, not reads. Due to differences in protocols comparison between human and mouse tissues is not recommended.



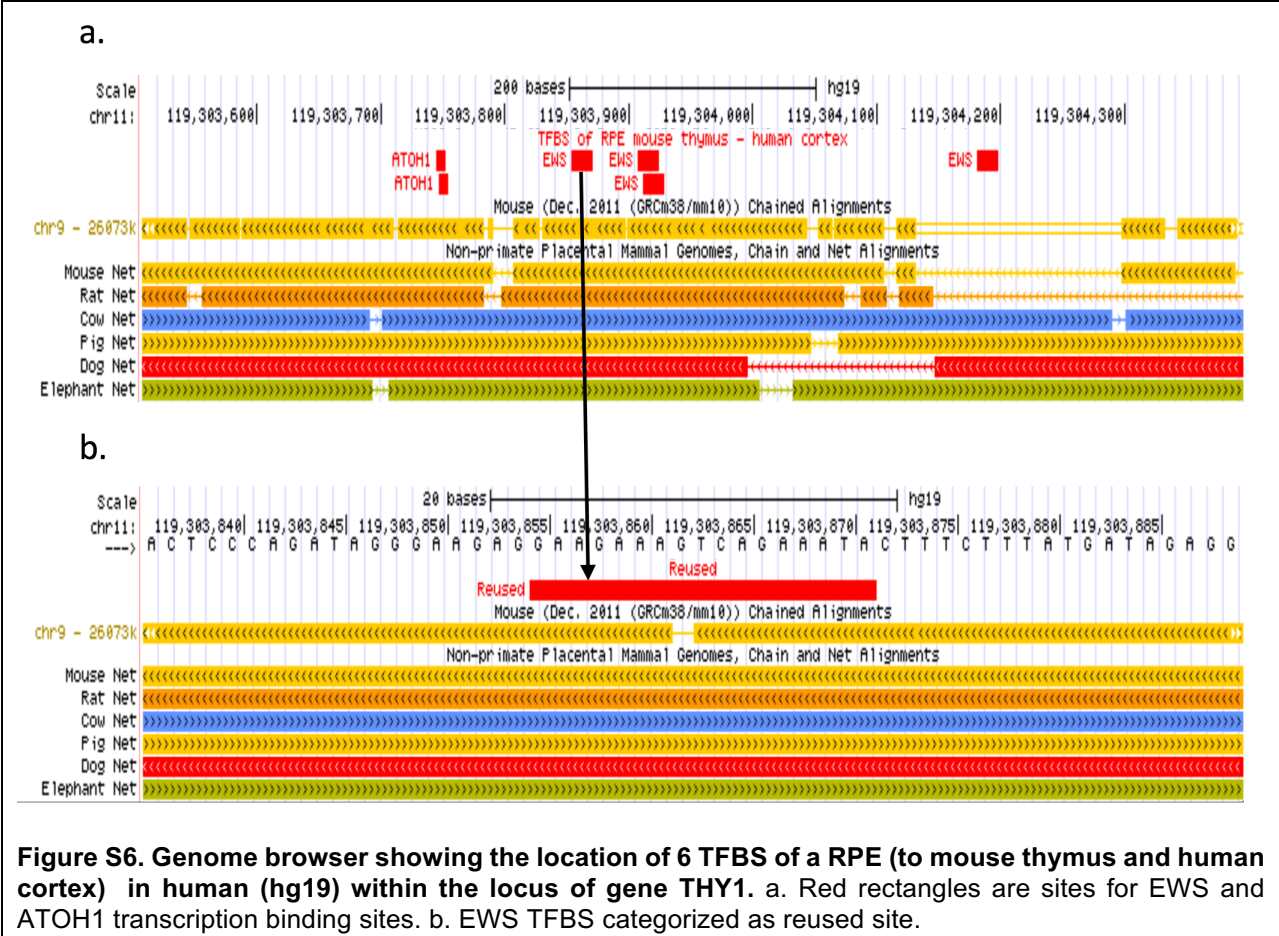

**Figure S6. Genome browser showing the location of 6 TFBS of a RPE (to mouse thymus and human cortex) in human (hg19) within the locus of gene THY1. a. Red rectangles are sites for EWS and ATOH1 transcription binding sites. b. EWS TFBS categorized as reused site.**

**Table S1. The number of reprogrammed enhancers for 11 pairs of tissues.** The index (m.) corresponds to mouse while the index (h.) corresponds to human, e.g., m.thymus-h.bat represents enhancers reprogrammed to mouse thymus and human BAT (brown adipose tissue). These sets are ordered by the number of enhancers for each human tissue.

|                        |      |                        |      |                        |      |
|------------------------|------|------------------------|------|------------------------|------|
| m.leukemia-h.bat       | 1084 | m.thymus-h.leukemia    | 866  | m.leukemia-h.placenta  | 783  |
| m.thymus-h.bat         | 1371 | m.spleen-h.leukemia    | 885  | m.spleen-h.placenta    | 1001 |
| m.spleen-h.bat         | 1439 | m.cortex-h.leukemia    | 941  | m.thymus-h.placenta    | 1009 |
| m.cortex-h.bat         | 1618 | m.bat-h.leukemia       | 961  | m.cortex-h.placenta    | 1053 |
| m.liver-h.bat          | 1673 | m.liver-h.leukemia     | 1003 | m.liver-h.placenta     | 1103 |
| m.limb-h.bat           | 1717 | m.intestine-h.leukemia | 1069 | m.bat-h.placenta       | 1141 |
| m.intestine-h.bat      | 1718 | m.limb-h.leukemia      | 1100 | m.limb-h.placenta      | 1239 |
| m.heart-h.bat          | 1926 | m.heart-h.leukemia     | 1108 | m.intestine-h.placenta | 1321 |
| m.placenta-h.bat       | 2233 | m.lung-h.leukemia      | 1200 | m.heart-h.placenta     | 1333 |
| m.lung-h.bat           | 2495 | m.placenta-h.leukemia  | 1408 | m.lung-h.placenta      | 1443 |
| m.leukemia-h.cortex    | 809  | m.leukemia-h.limb      | 1192 | m.leukemia-h.spleen    | 640  |
| m.spleen-h.cortex      | 955  | m.spleen-h.limb        | 1482 | m.thymus-h.spleen      | 770  |
| m.thymus-h.cortex      | 1138 | m.thymus-h.limb        | 1560 | m.lung-h.spleen        | 936  |
| m.heart-h.cortex       | 1217 | m.bat-h.limb           | 1922 | m.cortex-h.spleen      | 965  |
| m.bat-h.cortex         | 1243 | m.liver-h.limb         | 1927 | m.heart-h.spleen       | 1010 |
| m.liver-h.cortex       | 1247 | m.cortex-h.limb        | 1954 | m.liver-h.spleen       | 1093 |
| m.limb-h.cortex        | 1328 | m.intestine-h.limb     | 1991 | m.bat-h.spleen         | 1094 |
| m.intestine-h.cortex   | 1335 | m.heart-h.limb         | 2418 | m.limb-h.spleen        | 1104 |
| m.lung-h.cortex        | 1379 | m.placenta-h.limb      | 2454 | m.intestine-h.spleen   | 1151 |
| m.placenta-h.cortex    | 1780 | m.lung-h.limb          | 2611 | m.placenta-h.spleen    | 1577 |
| m.leukemia-h.heart     | 887  | m.leukemia-h.liver     | 1024 | m.leukemia-h.thymus    | 525  |
| m.spleen-h.heart       | 1093 | m.thymus-h.liver       | 1298 | m.spleen-h.thymus      | 671  |
| m.bat-h.heart          | 1137 | m.spleen-h.liver       | 1310 | m.liver-h.thymus       | 689  |
| m.liver-h.heart        | 1306 | m.bat-h.liver          | 1422 | m.bat-h.thymus         | 713  |
| m.lung-h.heart         | 1306 | m.cortex-h.liver       | 1506 | m.intestine-h.thymus   | 724  |
| m.thymus-h.heart       | 1347 | m.intestine-h.liver    | 1663 | m.cortex-h.thymus      | 729  |
| m.cortex-h.heart       | 1501 | m.heart-h.liver        | 1772 | m.limb-h.thymus        | 770  |
| m.intestine-h.heart    | 1503 | m.limb-h.liver         | 1781 | m.heart-h.thymus       | 795  |
| m.limb-h.heart         | 1564 | m.lung-h.liver         | 2047 | m.lung-h.thymus        | 882  |
| m.placenta-h.heart     | 2165 | m.placenta-h.liver     | 2145 | m.placenta-h.thymus    | 953  |
| m.leukemia-h.intestine | 556  | m.leukemia-h.lung      | 693  |                        |      |
| m.thymus-h.intestine   | 648  | m.spleen-h.lung        | 734  |                        |      |
| m.spleen-h.intestine   | 687  | m.heart-h.lung         | 856  |                        |      |
| m.liver-h.intestine    | 767  | m.cortex-h.lung        | 954  |                        |      |
| m.cortex-h.intestine   | 784  | m.liver-h.lung         | 1018 |                        |      |
| m.bat-h.intestine      | 785  | m.bat-h.lung           | 1051 |                        |      |
| m.limb-h.intestine     | 813  | m.thymus-h.lung        | 1087 |                        |      |
| m.heart-h.intestine    | 847  | m.intestine-h.lung     | 1175 |                        |      |
| m.lung-h.intestine     | 977  | m.limb-h.lung          | 1211 |                        |      |
| m.placenta-h.intestine | 1082 | m.placenta-h.lung      | 1523 |                        |      |

**Table S2. Proportion of RPEs in locus binned by the number of enhancers in human liver**

| No. enhancers In locus | No. total enhancers | No. RPEs | % RPEs | Expression (RPKM) |
|------------------------|---------------------|----------|--------|-------------------|
| 1                      | 3140                | 506      | 16     | 1.89              |
| 2                      | 3532                | 624      | 18     | 2.25              |
| 3                      | 3264                | 676      | 21     | 1.97              |
| 4                      | 2888                | 732      | 25     | 2.20              |
| 5                      | 2695                | 684      | 25     | 1.82              |
| 6                      | 2178                | 567      | 26     | 2.14              |
| 7                      | 2051                | 571      | 28     | 2.49              |
| 8                      | 1608                | 402      | 25     | 1.96              |
| 9                      | 1503                | 406      | 27     | 2.72              |
| 10                     | 1480                | 402      | 27     | 2.55              |
| 11                     | 1221                | 359      | 29     | 2.74              |
| 12                     | 852                 | 286      | 34     | 2.75              |
| 13                     | 1001                | 304      | 30     | 2.77              |
| 14                     | 798                 | 231      | 29     | 2.67              |
| 15                     | 810                 | 263      | 32     | 2.73              |
| 16                     | 768                 | 218      | 28     | 3.16              |
| 17                     | 731                 | 257      | 35     | 4.77              |

**Table S3. Proportion of RPEs in locus binned by the number of enhancers in human lung.**

| No. enhancers In locus | No. total enhancers | No. RPEs | % RPEs | Expression (RPKM) |
|------------------------|---------------------|----------|--------|-------------------|
| 1                      | 2639                | 477      | 18     | 1.89              |
| 2                      | 2750                | 621      | 23     | 2.63              |
| 3                      | 2331                | 610      | 26     | 2.92              |
| 4                      | 2108                | 633      | 30     | 2.91              |
| 5                      | 1540                | 442      | 29     | 3.16              |
| 6                      | 1920                | 576      | 30     | 2.99              |
| 7                      | 1470                | 454      | 31     | 4.50              |
| 8                      | 1288                | 377      | 29     | 3.59              |
| 9                      | 1215                | 388      | 32     | 3.84              |
| 10                     | 1260                | 361      | 29     | 3.38              |
| 11                     | 1221                | 322      | 26     | 4.48              |
| 12                     | 1020                | 324      | 32     | 3.85              |
| 13                     | 819                 | 229      | 28     | 5.77              |
| 14                     | 938                 | 279      | 30     | 5.41              |
| 15                     | 705                 | 230      | 33     | 4.86              |
| 16                     | 688                 | 218      | 32     | 5.04              |
| 17                     | 527                 | 173      | 33     | 4.91              |
